# Supplementary material for: [Development and validation of a course concept for Tactical Medical Mining Rescue : Standardized training curriculum for mine rescue teams].
Source: Springer Nature journal article supplement (doi:10.1007/s00063-021-00861-w), 2022-10-01
Supplement: MOESM1 [file 19678804]

## Zusatzmaterial

**Tabelle A1:** Vergleich der Gesamtbewertung nach OSPE-Station

|              | Grubenwehr |          |           | Rettungs-<br>dienst |          |           | Vergleich |                 |
|--------------|------------|----------|-----------|---------------------|----------|-----------|-----------|-----------------|
|              | <i>n</i>   | <i>M</i> | <i>SD</i> | <i>n</i>            | <i>M</i> | <i>SD</i> | <i>t</i>  | <i>p (holm)</i> |
| 1_Assessment | 13         | 3.14     | 0.44      | 16                  | 2.87     | 0.44      | 1.67      | 0.318           |
| 2_BLS-AED    | 13         | 3.58     | 0.24      | 16                  | 3.46     | 0.42      | 0.95      | 0.658           |
| 3_A&B        | 13         | 3.58     | 0.32      | 17                  | 3.10     | 0.51      | 3.17      | 0.023           |
| 4_Cex        | 13         | 3.71     | 0.32      | 15                  | 3.58     | 0.36      | 0.99      | 0.658           |
| 5_Cin        | 13         | 3.49     | 0.33      | 17                  | 2.97     | 0.83      | 2.39      | 0.102           |
| 6_D          | 13         | 3.42     | 0.64      | 16                  | 2.56     | 0.87      | 3.05      | 0.025           |
| 7_E          | 13         | 3.79     | 0.20      |                     |          |           |           |                 |

**Tabelle A2:** Vergleich der Rettungsdienstgruppen

|              | NFS      |          |           | NFS-Azubi |          |           | RA       |          |           | RS       |          |           |
|--------------|----------|----------|-----------|-----------|----------|-----------|----------|----------|-----------|----------|----------|-----------|
|              | <i>n</i> | <i>M</i> | <i>SD</i> | <i>n</i>  | <i>M</i> | <i>SD</i> | <i>n</i> | <i>M</i> | <i>SD</i> | <i>n</i> | <i>M</i> | <i>SD</i> |
| 1_Assessment | 6        | 2.84     | 0.47      | 4         | 3.11     | 0.31      | 2        | 3.27     | 0.39      | 4        | 2.46     | 0.21      |
| 2_BLS-AED    | 6        | 3.55     | 0.32      | 4         | 3.54     | 0.27      | 2        | 3.79     | 0.30      | 4        | 3.11     | 0.60      |
| 3_A&B        | 6        | 3.21     | 0.49      | 4         | 3.25     | 0.18      | 2        | 3.38     | 0.35      | 5        | 2.73     | 0.66      |
| 4_Cex        | 5        | 3.80     | 0.27      | 4         | 3.69     | 0.24      | 2        | 3.75     | 0.35      | 4        | 3.13     | 0.14      |
| 5_Cin        | 6        | 3.33     | 0.68      | 4         | 3.40     | 0.46      | 2        | 3.30     | 0.71      | 5        | 2.04     | 0.59      |
| 6_D          | 6        | 2.47     | 0.83      | 4         | 3.25     | 0.68      | 2        | 3.20     | 0.57      | 4        | 1.70     | 0.38      |

**NFS** Notfallsanitäter, **RA** Rettungsassistent, **RS** Rettungssanitäter

**Tabelle A3:** Vergleich der Einzel-Items der OSPE-Prüfung zwischen der Gruppe Grubenwehr (nach dem Training) und Rettungsdienst (ohne Rettungssanitäter).

| OSPE Hauptgruppen |                          | Grubenwehr |       |       | Rettungsdienst |       |       |
|-------------------|--------------------------|------------|-------|-------|----------------|-------|-------|
|                   |                          | n          | M     | SD    | n              | M     | SD    |
| 1_Assessment      | Eigenschutz              | 13         | 2.846 | 1.281 | 16             | 2.375 | 1.746 |
|                   | c                        | 13         | 3.385 | 1.044 | 16             | 4     | 0     |
|                   | AVPU                     | 13         | 3.615 | 0.65  | 16             | 0     | 0     |
|                   | ABCDE-Start              | 13         | 3.085 | 0.948 | 16             | 3.462 | 0.913 |
|                   | A                        | 13         | 2.769 | 0.927 | 16             | 3.375 | 0.619 |
|                   | B                        | 13         | 3     | 1     | 16             | 3.188 | 0.75  |
|                   | C                        | 13         | 3.154 | 0.801 | 16             | 3     | 0.73  |
|                   | D                        | 13         | 3.385 | 0.87  | 16             | 2.562 | 0.814 |
|                   | E                        | 13         | 2.923 | 0.954 | 16             | 2.625 | 0.806 |
|                   | Ablauf                   | 13         | 3.154 | 0.801 | 16             | 3.062 | 0.772 |
|                   | Pulsoxymetrie            | 13         | 3.231 | 1.166 | 16             | 3.875 | 0.5   |
| 2_BLS-AED         | Druckpunkt               | 13         | 4     | 0     | 16             | 3.812 | 0.544 |
|                   | Mechanik                 | 13         | 3.769 | 0.439 | 16             | 3.688 | 0.873 |
|                   | AED frühzeitig           | 13         | 3.231 | 0.832 | 16             | 2.938 | 0.854 |
|                   | AED richtig              | 13         | 3.769 | 0.599 | 16             | 3.562 | 1.031 |
|                   | Beatmung                 | 13         | 3.846 | 0.376 | 16             | 3.938 | 0.25  |
|                   | Atemwegsmanagement (BLS) | 13         | 3.154 | 0.801 | 16             | 3.125 | 0.719 |
|                   | No-Flow-Zeit             | 13         | 3.308 | 0.751 | 16             | 3.188 | 0.834 |
| 3_A&B             | Kopfposition             | 13         | 2.923 | 0.641 | 17             | 3.235 | 0.903 |
|                   | Esmarch-Handgriff        | 13         | 3.385 | 0.65  | 17             | 2.235 | 1.348 |
|                   | Atemweg (A&B)            | 13         | 3.846 | 0.555 | 17             | 3.706 | 0.772 |
|                   | Wendl                    | 13         | 3.769 | 0.439 | 17             | 2.647 | 1.057 |

|       |                                | Grubenwehr |       |       | Rettungsdienst |       |       |
|-------|--------------------------------|------------|-------|-------|----------------|-------|-------|
|       | Beatmung Maske                 | 13         | 3.846 | 0.376 | 17             | 3.294 | 0.92  |
|       | LMA-Anlage                     | 13         | 3.769 | 0.439 | 17             | 3.059 | 0.659 |
|       | Beatmung LMA                   | 13         | 3.846 | 0.376 | 17             | 3.235 | 0.831 |
|       | Stiffneck                      | 13         | 3.231 | 0.832 | 17             | 3.353 | 0.702 |
| 4_Cex | Druckverband                   | 13         | 4     | 0     | 15             | 4     | 0     |
|       | Celox-Tamponade                | 13         | 3.769 | 0.439 | 15             | 3.867 | 0.352 |
|       | Tourniquet                     | 13         | 3.769 | 0.439 | 15             | 3.333 | 0.816 |
|       | Interpretation Pulsoxy         | 13         | 3.308 | 1.182 | 15             | 3.133 | 0.834 |
| 5_Cin | MAD                            | 13         | 3.769 | 0.599 | 17             | 3.471 | 0.874 |
|       | Medikamenten-kunde             | 13         | 3.769 | 0.439 | 17             | 2.471 | 1.125 |
|       | Infusion                       | 13         | 3.308 | 0.751 | 17             | 3.471 | 0.8   |
|       | io-Zugang                      | 13         | 3.231 | 0.599 | 17             | 2.706 | 1.263 |
|       | lauffähige Installation        | 13         | 3.385 | 0.65  | 17             | 2.706 | 0.985 |
| 6_D   | Bodycheck                      | 13         | 3.615 | 0.65  | 16             | 3.125 | 0.719 |
|       | Log-Rol                        | 13         | 3.231 | 0.927 | 16             | 1.25  | 1.571 |
|       | Reposition /Schienung          | 13         | 3.308 | 0.855 | 16             | 2.938 | 0.929 |
|       | Beckengurt                     | 13         | 3.385 | 0.768 | 16             | 3.125 | 1.025 |
|       | Entlastungspunktion            | 13         | 3.538 | 0.877 | 16             | 2.375 | 1.544 |
| 7_E   | Reevaluation ABCDE-<br>Pulsoxy | 13         | 3.538 | 0.519 | 17             | 0     | 0     |
|       | Transfer Trage                 | 13         | 3.923 | 0.277 | 17             | 0     | 0     |
|       | Position Equipment             | 13         | 4     | 0     | 17             | 0     | 0     |
